# Supplementary material for: Projected change in global fisheries revenues under climate change
Source: PubMed Central journal article supplement (PMC5013467; doi:10.1038/srep32607), 2016-09-07
Supplement: srep32607-s1.pdf [file srep32607-s1.pdf]

1 **Supplementary Information**

2  
3 **Manuscript title: Projected change in global fisheries revenues under climate change**

4  
5 **Authors:** Vicky W. Y. Lam, William W. L. Cheung, Gabriel Reygondeau and U. Rashid  
6 Sumaila

7  
8 **Climate scenarios and models**

9 To explore future changes in potential fisheries catches during the period from 1971 to  
10 2060, environmental outputs of several atmospheric-ocean physical models coupled with  
11 biogeochemical models have been acquired. Annual average values of surface and bottom sea  
12 water temperature ( $^{\circ}\text{C}$ ), oxygen concentration ( $\text{ml.L}^{-1}$ ), salinity, net primary production  
13 ( $\text{mgC.km}^2.\text{year}^{-1}$ ), surface advection (zonal and meridional vectors in  $\text{m.sec}^{-1}$ ), and percentage of  
14 sea ice coverage (%) were gathered from the outputs of the Geophysical Fluid Dynamics  
15 Laboratory Earth System Model (GFDL ESM2M)<sup>1</sup>, the Institut Pierre Simon Laplace model<sup>2</sup>  
16 (IPSL-CM5-MR) and from the Max Planck Institute for Meteorology model (MPI-ESM)<sup>3</sup>. Each  
17 environmental output is re-gridded onto a regular grid of  $0.5^{\circ}$  using the nearest neighbour method  
18 and values in some coastal cells were extrapolated using bilinear extrapolation.

19  
20 The different types of uncertainties associated with the use of climate models have been  
21 explored in this study. Firstly, to evaluate the uncertainties associated to future climate projections  
22 due to potential changes in Green House Gas (GHG) emissions, two representative concentration  
23 pathways scenario (RCP 2.6 and 8.5) are gathered for each environmental variables from the

24 GFDL-ESM2M. The first scenario (RCP2.6) emphasizes the radiative forcing trajectory peaked at  
25  $3\text{W/m}^2$  before 2100 and then followed by a decline to  $2.6\text{W/m}^2$  by 2100. The second scenario  
26 (RCP8.5) is a high emission scenario with rising radiative forcing pathway leading to  $8.5\text{W/m}^2$  by  
27 2100<sup>4</sup>. GFDL ESM2M model has been selected as the main model because of its good skills in  
28 representing climate changes relating to surface circulation particularly in simulating surface  
29 temperature, salinity, and height patterns, tropical Pacific circulation and variability; and Southern  
30 Ocean dynamics<sup>1</sup>. Secondly, to explore the inter-model uncertainties, our projections were also  
31 driven by the two other IPCC-class Earth System Models (IPSL-CM5-MR and MPI-ESM-MR).

32

### 33 **Biological Model**

34 The Dynamic Bioclimate Envelope Model (DBEM) simulates changes in the distributions  
35 and relative abundances of the marine species under the climate change scenarios.

#### 36 ***Current species distribution***

37 Current species' distributions in the recent decade (1971 – 2000) were obtained using a  
38 spatial distribution model developed by the *Sea Around Us*<sup>5,6</sup>([www.searoundus.org](http://www.searoundus.org)). The model  
39 determines distributions of marine fishes and invertebrates by predicting the relative abundance of  
40 a species on a 30' latitude x 30' longitude grid based on the species' (i) known FAO area(s); (ii)  
41 latitudinal range; (iii) polygons encompassing their known occurrence regions; (iv) depth range;  
42 and (v) habitat preferences (for detailed methodology, please refer to Close *et al.*<sup>5</sup>).

#### 43 ***Projecting future distribution***

44 DBEM simulates how changes in temperature and oxygen content (represented by O<sub>2</sub>  
45 concentration) would affect growth of marine fishes and invertebrates. This model was done for  
46 each species. The model algorithm is derived from a growth function:

$$47 \quad \frac{dB}{dt} = H \cdot W^a - k \cdot W \quad (1)$$

48 where  $H$  and  $k$  are coefficients for anabolism and catabolism, respectively.  $B$  is the biomass of  
49 each species. Anabolism scales with body weight ( $W$ ) with an exponent  $a < 1$ , while catabolism  
50 scales linearly with  $W$ . Solving for  $dB/dt = 0$ , we obtained  $H = k$  where  $W_\infty$  is the asymptotic  
51 weight.

52 Equation (1) can be integrated to a generalized von Bertalanffy Growth Function (VBGF;  
53 Pauly 1981):

$$54 \quad W_t = W_\infty \cdot [1 - e^{-K \cdot (t-t_0)}]^{1/a} \quad (2)$$

55 where  $K$  is the von Bertalanffy growth parameter.

56

57 For simplification, we assume that  $a = 0.7$ , although empirical studies show that  $a$  generally  
58 varies from 0.50 to 0.95 between fish species<sup>7,8</sup>, with 2/3 corresponding to the special or standard  
59 VBGF.

60 Moreover, metabolism is temperature dependent and aerobic scope is dependent on oxygen  
61 availability in water and maintenance metabolism is affected by physiological stress (e.g.,  
62 increased acidity). Thus:

$$63 \quad H = g \cdot [O_2] \cdot e^{-j_1/T} \quad (3a)$$

64 
$$k = h \cdot [H^+] \cdot e^{-j_2/T} . \quad (3b)$$

65 where  $j = E_a/R$  with  $E_a$  and  $R$  are the activation energy and Boltzmann constant, respectively, while  
 66  $T$  is temperature in Kelvin. In addition, the aerobic scope of marine fishes and invertebrates  
 67 decreases as temperature approaches their upper and lower temperature limits<sup>9</sup>. The coefficients  $g$   
 68 and  $h$  were derived from the average  $W_\infty$ ,  $K$  and environmental temperature ( $T_o$ ) of the species  
 69 reported in literature:

70 
$$g = \frac{W_\infty^{1-a} \cdot K}{[O_2] \cdot e^{-j_1/T_o}} \quad (4a)$$

71 
$$h = \frac{K/(1-a)}{[H^+] \cdot e^{-j_2/T_o}} \quad (4a)$$

72 where  $H = k$  and  $k = K / (1-a)$  (eq. 1 and 2).

73 The model predicts changes in VGBF parameters according to changes in temperature,  
 74 oxygen, and pH in the ocean relative to the initial conditions, as:

75 
$$W_\infty = \left(\frac{H}{k}\right)^{\frac{1}{(1-a)}} \quad (5a)$$

76 
$$K = k \cdot (1 - a) \quad (5b)$$

77 Based on the computed VGBF parameters and environmental conditions, the model  
 78 determined change in carrying capacity in each 30' latitude x 30' longitude cell. The model  
 79 identifies the 'environmental preference profiles' of the studied species, defined by the sea water  
 80 temperature (bottom and surface), depth, salinity, distance from sea-ice and habitat types.  
 81 Preference profiles are defined as the suitability of each of these environmental conditions to each  
 82 species, with suitability calculated by overlaying environmental data (1970-2000) with distribution

83 range of relative abundance of the species<sup>10</sup>. Temperature is not used for predicting baseline  
84 current distribution<sup>11</sup>. For example, for each species, the model calculated a temperature  
85 preference profile for the adult and the pre-recruit phases based on the relative abundance and the  
86 computed recruitment strength of the species. Sea surface temperature is then used for temperature  
87 preference profiles for pre-recruit phase while bottom temperature is applied to preference profiles  
88 for adult demersal species. Moreover, the carrying capacity is expressed as a function of expected  
89 biomass per recruit and recruitment. Expected biomass per recruit was determined by a size-based  
90 population model. Thus, a change in species' carrying capacity in each spatial cell is dependent on  
91 its calculated theoretical relative abundance, environmental preferences and net primary  
92 production. Natural mortality rate ( $M$ ) and length at maturity are determined from published  
93 empirical equations (see Cheung *et al.*<sup>12</sup> for details). Initial relative recruitment strength ( $R$ ) is  
94 calculated from the initial relative abundance ( $A$ , normalized across the 30' x 30' degree resolution  
95 grid) and calculated biomass per recruit ( $BPR$ ) in each cell, as

$$BPR = c \cdot A / R \quad (6a)$$

96 where  $c$  is a constant that scales from relative abundance to absolute abundance. Thus,

$$R = c \cdot A / BPR \quad (6b)$$

97 and

$$A = BPR \cdot R / c \quad (6c)$$

98 The model simulates changes in relative abundance of a species by:

$$\frac{dA_i}{dt} = \sum_{j=1}^N (L_{ji} + I_{ji}) + G_i \quad (7)$$

99 where  $A_i$  is the relative abundance of a 30' x 30' cell  $i$ ,  $G$  is the intrinsic population growth and  $L_{ji}$   
 100 and  $I_{ji}$  are settled larvae and net migrated adults from surrounding cells ( $j$ ), respectively.

101

102 Intrinsic growth is modeled by a logistic equation:

$$G_i = r \cdot A_i \cdot \left(1 - \frac{A_i}{A_{\infty,i}}\right) \quad (8)$$

103 where  $r$  is the intrinsic rate of population increase. The model explicitly represents larval dispersal  
 104 through ocean current with an advection-diffusion-reaction model (see Cheung *et al.*<sup>10</sup> for details).

$$\frac{\partial Lav}{\partial t} = \frac{\partial}{\partial x} \left( D \frac{\partial Lav}{\partial x} \right) + \frac{\partial}{\partial y} \left( D \frac{\partial Lav}{\partial y} \right) - \frac{\partial}{\partial x} (u \cdot Lav) - \frac{\partial}{\partial y} (v \cdot Lav) - \lambda \cdot Lav \quad (9)$$

105 where change in relative larvae abundance over time ( $\partial Lav/\partial t$ ) is determined by diffusion (i.e., the  
 106 first two terms on the right-hand side of eq. 9) and current-driven movements (i.e., the third and  
 107 fourth terms of eq. 9). Diffusion is characterized by a diffusion parameter  $D$ , while advection is  
 108 characterized by the two current velocity parameters ( $u$ ,  $v$ ) which describe the east-west and north-  
 109 south current movement.

110

### 111 ***Maximum Catch Potential***

112 We applied a constant fishing mortality rate across the geographic range of each species.  
 113 Specifically, to predict the theoretical maximum potential catches (MCP), we assumed that fishing

114 was approximately at maximum sustainable yield (MSY) throughout the simulation. Given that  
 115 logistic population growth was assumed in all versions of DBEM, fishing mortality rate at MSY  
 116 for each species was equal to half of the intrinsic population growth rate of the species. i.e.,  $F =$   
 117  $r/2$ . The resulted outputs were the MCP of each species in each grid cell at each time step. To  
 118 allocate the MCP of each species to each fishing country in each cell, we used the current cell-  
 119 based catch data from the reconstructed catch database developed by *Sea Around Us*  
 120 ([www.seaaroundus.org](http://www.seaaroundus.org)). In the *Sea Around Us* catch data, the historical and current catch data of  
 121 each marine species was allocated to each half degree cell using three main components: 1. the  
 122 catch data; 2. the fishing access observations/agreements, and 3. the biological taxon  
 123 distributions<sup>13</sup>. MCP of each species in each cell is calculated by:

$$MCP_{ijk} = MCP_{ik} * \frac{C_{ijk}}{\sum_{j=1}^m (C_{ijk})} \quad (10)$$

124 where  $MCP_{ijk}$  is the maximum catch potential of species  $i$  by country  $j$  in a cell  $k$  and  $MCP_{ik}$  is  
 125 the total maximum catch potential of species  $i$  in a cell  $k$ .  $C_{ijk}$  is the current catch (average from  
 126 year 1991 to 2010) of species  $i$  by country  $j$  in a cell  $k$ .

127

129 Table S1. Parameters of the DBEM.

| <b>Parameters</b>                                                                                             | <b>Symbols</b>              | <b>Unit</b>        |
|---------------------------------------------------------------------------------------------------------------|-----------------------------|--------------------|
| Abundance                                                                                                     | $A$                         | No. of individuals |
| Activation energy                                                                                             | $E_a$                       |                    |
| Area the geographic range of a species                                                                        | $A$                         |                    |
| Asymptotic weight                                                                                             | $W_\infty$                  |                    |
| Biomass                                                                                                       | $B$                         | t                  |
| Biomass per recruit                                                                                           | $BPR$                       | t                  |
| Body weight                                                                                                   | $W$                         |                    |
| Boltzmann constant                                                                                            | $R$                         |                    |
| Change in relative larvae abundance over time                                                                 | $(\partial Lav/\partial t)$ |                    |
| Coefficient for anabolism                                                                                     | $H$                         |                    |
| Coefficient for catabolism                                                                                    | $k$                         |                    |
| Coefficients derived from the average $W_\infty$ , $K$ and environmental temperature ( $T_o$ ) of the species | $g, h$                      |                    |
| Diffusion coefficient                                                                                         | $D$                         | $m \cdot s^{-1}$   |
| East-west current velocity                                                                                    | $u$                         | $m \cdot s^{-1}$   |
| Initial relative recruitment strength                                                                         | $R$                         |                    |
| Intrinsic population growth                                                                                   | $G$                         | year <sup>-1</sup> |
| Intrinsic rate of population increase                                                                         | $r$                         |                    |
| Maximum sustainable yield                                                                                     | $MSY$                       | t                  |
| Natural mortality rate                                                                                        | $M$                         | year <sup>-1</sup> |
| Net migrated juveniles and adults from surrounding cells j to cell i                                          | $I_{ij}$                    | count              |
| North-south current velocity                                                                                  | $v$                         | $m \cdot s^{-1}$   |
| Number of grid cells                                                                                          | $N$                         | Count              |
| Primary production within its exploitable range                                                               | $P$                         |                    |



|                                                                               |           |        |
|-------------------------------------------------------------------------------|-----------|--------|
| Proportion of exploitable range relative to the geographic range of a species | $\alpha$  |        |
| Seawater temperature                                                          | $T$       | Kelvin |
| Settled larvae                                                                | $L$       |        |
| Trophic level                                                                 | $\lambda$ |        |
| von Bertalanffy growth parameter                                              | $K$       |        |

130

131 ***DBEM – alternative structure***

132 We applied alternative versions of DBEM for assessing the structural uncertainty of the  
133 projections. Other than using the spatial distribution model (SDM) developed by *Sea Around Us*,  
134 we used two other species distribution models, Maxent and AquaMaps, that are generative  
135 statistical procedures to determine species’ environmental envelopes from species occurrence data  
136 and a suite of environmental variables<sup>14</sup>. These two models were applied to predict the current  
137 distribution of marine species using 30-year averaged environmental data center on 1985 (1970 –  
138 1999). Then, we applied the oceanographic variables from the GFDL ESM2M to project species  
139 distribution using the 2 spatial distribution model. For details of these two models, please refer to  
140 the supplementary information of Jones & Cheung<sup>14</sup> and Cheung *et al.* in press<sup>15</sup>. The models that  
141 we used to address the uncertainty of the ESMs and the structural uncertainty of the projections  
142 are summarized in Table S2. The results from the DBEM using different SDMs are shown in Table  
143 S3.

144

145

146 Table S2. Climate scenarios used in this study.

|                             |               |               |                                       |        |                   |               |
|-----------------------------|---------------|---------------|---------------------------------------|--------|-------------------|---------------|
|                             |               |               | Structural uncertainty of projections |        | Model uncertainty |               |
| Climate scenarios           | RCP 2.6       | RCP 8.5       |                                       |        |                   |               |
| Earth System Models (ESM)   | GFDL          | GFDL          | GFDL                                  | GFDL   | IPSL              | CMIP          |
| Spatial distribution models | Sea Around Us | Sea Around Us | AquaMaps                              | Maxent | Sea Around Us     | Sea Around Us |

147

148 Table S3. Percentage change in the global maximum catch potential and maximum revenue  
 149 potential in fisheries from the DBEM using different spatial distribution models under RCP 8.5  
 150 scenario in the 2050s from the current status (2000s).

| % change in global maximum revenue potential in fisheries in the 2050s from the current status (2000s) |       |          |        |      |                    |  |
|--------------------------------------------------------------------------------------------------------|-------|----------|--------|------|--------------------|--|
| Earth System Model<br>Spatial distribution models                                                      | GFDL  |          |        | Mean | Standard deviation |  |
|                                                                                                        | Basic | AquaMaps | Maxent |      |                    |  |
| Maximum catch potential                                                                                | -4.4  | -8.2     | -3.6   | -5.4 | 2.4                |  |
| Maximum revenue potential                                                                              | -6.9  | -9.6     | -4.1   | -6.9 | 2.8                |  |

151

152 **Estimating economic parameters**

153 ***Fisheries revenue***

154 Total global revenues is the product of ex-vessel price ( $P$ ) and landing in the case of  
 155 commercial fisheries. In our model, the global total maximum revenue potential (MRP) in fisheries  
 156 can be expressed as:

$$MRP = \sum_{j=1}^m \left[ \sum_{i=1}^n (P_{ij} * MCP_{ij}) \right] \quad (11)$$

157 where  $P_{ij}$  is ex-vessel price and  $MCP_{ij}$  is the current maximum catch potential (the model MCP)  
 158 of species  $i$  caught by country  $j$ . The total fisheries MRP of each country  $j$  was first computed by  
 159 summing up MRP (i.e., modelled landed values) of  $n$  species caught from its EEZ  $j$ , other EEZs  
 160 and the high seas. The current total MRP was estimated using a 20-year (from 1991 – 2010)  
 161 average ex-vessel prices of each species in 2005 real dollars<sup>16,17</sup> by each country and the 20-year  
 162 average MCP data from the DBEM. Then, the global total fisheries MRP was obtained by  
 163 summing up the fisheries MRP of all countries, where the total number of fishing countries is  $m$   
 164 ( $m = 192$ ).

165 Projected total MRP ( $MRP'$ ) is the product of ex-vessel price ( $P'$ ) and projected MCP  
 166 ( $MCP'$ ) of each species and can be expressed as:

$$MRP' = \sum_{j=1}^m \left[ \sum_{i=1}^n (P'_{ij} * MCP'_{ij}) \right] \quad (12)$$

167 The ex-vessel price of each species  $i$  in each country  $j$  ( $P'_{ij}$ ) was assumed to be constant through  
 168 time, although fish prices could be influenced by local markets, the global supply of fish,  
 169 preference of consumers, prices of alternative products on the market and also the abundance of  
 170 targeted species<sup>18-22</sup>. The projected imbalance between fish supply and demand might also lead to  
 171 increases in fish price<sup>23,24</sup>. This study assumes that the real ex-vessel price (after adjusting for  
 172 inflation) to be constant throughout the study period because the projection of future price is  
 173 limited by data availability and model complexity. Also, real ex-vessel fish prices have remained  
 174 relatively stable since 1970<sup>17,25</sup>. Although real fish prices are likely to rise in the future, for example,  
 175 fish prices were projected to increase by about 6 – 15% over the 1997 level by 2020<sup>26</sup>, the constant  
 176 price assumption allows us to understand the general pattern of the impact of climate change on

177 global fisheries economics before a more detailed price projection model is available<sup>25</sup>. Meanwhile,  
178 sensitivity analysis is carried out to explore how changes in prices are likely to affect the results  
179 derived from our study.

180

### 181 **Estimating economic uncertainties**

182 It is expected that change in price trends is crucial to the degree of impact of climate change on  
183 fisheries and its subsequent economics. Therefore, we tested the sensitivity of our results to price  
184 based on available price information. We adopted the project scenarios described in the IMPACT  
185 model<sup>26</sup> as our catch scenarios in this analysis. Table S4 describes the details of each scenario.  
186 Then, the price ranges from 1997 to 2020 provided in literature<sup>26</sup> were used to project the price  
187 range from 2000 to 2050 of each scenario in our analysis. We assumed that the rate of price change  
188 is constant throughout the time period. Then, the annual percentage change in price was calculated  
189 by dividing the projected total change in price by the total number of years from 1997 to 2020 (i.e.,  
190 24 years). By assuming the price would increase at the same rate from 2000 to 2050, we then  
191 estimated the total price change in 2050 relative to the level in 2000. The projected percentage of  
192 total price change of each commodity group in 2050 is shown in Table S5.

193

### 194 *Determine the high price and low price species*

195 Since the SAU catch database does not associate with the commodity groups, we allocated  
196 different marine species to the 4 commodity groups listed in Table S5 based on the functional  
197 groups that they belong to and also their price ranges. For finfish, we segregated them into low  
198 value and high value groups based on their current ex-vessel price. We first took the median price  
199 of all the exploited marine fish species (i.e., US\$ 1,924) and then used that as the threshold for

200 segregating low and high values fish species. For any fish species with prices lower than this  
 201 threshold price, we considered them as low price food fish and vice versa.

202

203

204 Table S4. Description of production scenarios.

| Scenario                        | Description                                                                                                                                                                                                                                                                                                                                                                                                                                                                                |
|---------------------------------|--------------------------------------------------------------------------------------------------------------------------------------------------------------------------------------------------------------------------------------------------------------------------------------------------------------------------------------------------------------------------------------------------------------------------------------------------------------------------------------------|
| 1. Baseline                     | Judged to be the most plausible set of assumptions.                                                                                                                                                                                                                                                                                                                                                                                                                                        |
| 2. Faster aquaculture expansion | Production growth trends, excluding supply response to price change, for all four aquaculture output aggregate commodities are increased by 50 percent relative to the baseline scenario.                                                                                                                                                                                                                                                                                                  |
| 3. Lower China production       | Chinese capture fisheries production is reduced by 4.6 mmt in base year 1996–98 following Watson and Pauly (2001). Consumption is reduced an identical amount to maintain balance. Reductions are spread proportionately among fish commodities. Income demand elasticities, production growth trends, and feed conversion ratios are adjusted downward, consistent with the view that actual growth in production and consumption over past two decades was in fact slower than reported. |
| 4. Fishmeal and oil efficiency  | Feed conversion efficiency for fishmeal and fish oil improves at twice the rate specified in the baseline scenario.                                                                                                                                                                                                                                                                                                                                                                        |
| 5. Slower aquaculture expansion | Production growth trends, excluding supply response to price change, for all aquaculture commodities is decreased by 50 percent relative to the baseline scenario.                                                                                                                                                                                                                                                                                                                         |

205 Source: Delgado (2003)<sup>26</sup>

206

207 Table S5. Projected total change in prices under different production scenarios, 2000 – 2050.

| Seafood groups      | Projected total change in price (%) , 2000 – 2050 |                              |                        |                                  |                              |
|---------------------|---------------------------------------------------|------------------------------|------------------------|----------------------------------|------------------------------|
|                     | Base line                                         | Faster Aquaculture expansion | Lower China production | Fishmeal and fish oil efficiency | Slower aquaculture expansion |
| Low value food fish | 13.04                                             | -26.09                       | 13.04                  | 10.87                            | 54.00                        |
| High-value finfish  | 32.61                                             | 19.57                        | 34.78                  | 30.43                            | 41.30                        |
| Crustacean          | 34.78                                             | 8.70                         | 41.30                  | 32.61                            | 56.52                        |
| Mollusks            | 8.70                                              | -34.78                       | 6.52                   | 6.52                             | 54.00                        |

208

209 *Project landed values under different production scenario*

210 With the projected total price change of each commodity group, we projected the price of each  
211 marine species in the 2050s under different production scenarios. The future fisheries MRP were  
212 then calculated with these projected prices and projected catch under the RCP 8.5 and RCP 2.6  
213 scenarios. The percentage changes in the fisheries MRP under different production scenarios are  
214 shown in Table 2 in the main text.

215

216

### 217 **Dependency of a country's national economy on its fisheries**

218 We used the percentage of current total economic impact of fisheries sector to a country's  
219 national Gross Domestic Product (GDP) to determine the importance of the fisheries sector to a  
220 country's economy. To capture important contributions of fish populations to the whole economy,  
221 the value created through the production chain was also captured in this study. The added value or  
222 impact through the fish value chain is the indirect economic effects of fisheries due to their impact  
223 on activities such as boat building/maintenance, equipment supply and the restaurant sector<sup>27</sup>. In  
224 most of the countries, fisheries constitute a base industry to the whole national economy, for  
225 example, in Iceland and in Greenland<sup>28</sup>. The estimated indirect and induced economic impacts of  
226 climate change on the fisheries sector of each fishing country were estimated by applying the  
227 national fishing output multipliers,  $M_i$ , reported in Dyck and Sumaila<sup>29</sup> (Table S6).

$$Economic\ Impact = Total\ Revenue * M_i \quad (13)$$

228 The GDP of each country in 2010 was obtained from International Monetary Fund (IMF),  
229 World Economic Outlook Database

230 (<https://www.imf.org/external/pubs/ft/weo/2014/02/weodata/index.aspx>). The total revenue is the

231 current actual landed values obtained from *Sea Around Us* and Fisheries Economics Research  
232 Unit price database<sup>17</sup>. Then, the percentage of the economic impact by the fisheries sector to the  
233 total GDP of a country was computed to represent the dependency of a country's national  
234 economy on fisheries (Table S7).

235

### 236 **Human Development Index**

237 In this study, the Human Development Index (HDI) (<http://hdr.undp.org/en>), which is a  
238 composite index measuring average achievement in the 3 basic dimensions of human  
239 development (i.e., a long and healthy life, knowledge and a decent standard of living), is used to  
240 represent the adaptive capacity of a country to climate change. The HDI of the most recent year  
241 available (2013) was obtained from the United Nations Development Programme  
242 (<http://hdr.undp.org/en/content/human-development-index-hdi-table>) (Table S7).

243

244 Table S6. National fishing output multipliers by country<sup>29</sup>.

| Country           | Output multiplier | Country            | Output multiplier |
|-------------------|-------------------|--------------------|-------------------|
| Albania           | 1.63              | Cayman Is          | 1.22              |
| Algeria           | 1.19              | Chile              | 2.44              |
| American Samoa    | 3.34              | China Main         | 3.34              |
| Angola            | 3.54              | Colombia           | 3.14              |
| Anguilla          | 1.21              | Comoros            | 2.95              |
| Antigua Barb      | 1.22              | Congo Dem Rep      | 3.53              |
| Argentina         | 2.97              | Congo Rep          | 2.96              |
| Aruba             | 1.23              | Cook Is.           | 3.34              |
| Australia         | 3.69              | Costa Rica         | 2.16              |
| Bahamas           | 1.22              | Cote d'Ivoire      | 1.52              |
| Bahrain           | 1.02              | Croatia            | 3.27              |
| Bangladesh        | 2.97              | Cuba               | 1.22              |
| Barbados          | 1.21              | Cyprus             | 0.61              |
| Belgium           | 6.22              | Denmark            | 3.72              |
| Belize            | 3.46              | Djibouti           | 3.00              |
| Benin             | 1.52              | Dominica           | 1.22              |
| Bermuda           | 7.34              | Dominican Republic | 1.21              |
| Br Virgin Is      | 1.21              | East Timor         | 2.11              |
| Brazil            | 2.39              | Ecuador            | 3.25              |
| Brunei Darussalam | 2.16              | Egypt              | 2.42              |
| Bulgaria          | 18.34             | El Salvador        | 3.46              |
| Cambodia          | 1.73              | Equatorial Guinea  | 2.97              |
| Cameroon          | 2.96              | Eritrea            | 2.95              |
| Canada            | 3.30              | Estonia            | 3.81              |
| Cape Verde        | 1.52              | Faeroe Is          | 2.10              |



| Country       | Output multiplier | Country                | Output multiplier |
|---------------|-------------------|------------------------|-------------------|
| Falkland Is   | 2.12              | India                  | 1.36              |
| Fiji          | 3.34              | Indonesia              | 1.66              |
| Finland       | 1.56              | Iran                   | 1.94              |
| Fr Guiana     | 2.12              | Iraq                   | 1.03              |
| Fr Polynesia  | 3.34              | Ireland                | 2.15              |
| France        | 4.11              | Israel                 | 1.03              |
| Gabon         | 2.96              | Italy                  | 1.75              |
| Gambia        | 1.52              | Jamaica                | 1.22              |
| Gaza Strip    | 1.02              | Japan                  | 2.75              |
| Georgia       | 2.04              | Jordan                 | 1.06              |
| Germany       | 3.28              | Kenya                  | 2.95              |
| Ghana         | 1.52              | Kiribati               | 3.34              |
| Gibraltar     | 0.00              | Korea D P Rp (N Korea) | 3.04              |
| Greece        | 3.31              | Korea Rep (S Korea)    | 2.91              |
| Greenland     | 7.38              | Kuwait                 | 1.02              |
| Grenada       | 1.21              | Latvia                 | 4.31              |
| Guadeloupe    | 1.21              | Lebanon                | 1.02              |
| Guam          | 3.36              | Liberia                | 1.52              |
| Guatemala     | 1.87              | Libya                  | 1.19              |
| Guinea        | 1.52              | Lithuania              | 3.79              |
| Guinea Bissau | 1.52              | Macau                  | 3.05              |
| Guyana        | 2.12              | Madagascar             | 2.34              |
| Haiti         | 1.22              | Malaysia               | 2.58              |
| Honduras      | 3.46              | Maldives               | 2.97              |
| Hong Kong     | 2.59              | Malta                  | 2.54              |
| Iceland       | 2.49              | Marshall Is            | 3.34              |

| Country              | Output multiplier | Country           | Output multiplier |
|----------------------|-------------------|-------------------|-------------------|
| Martinique           | 1.21              | Panama            | 2.56              |
| Mauritania           | 1.52              | Papua New Guinea  | 3.34              |
| Mauritius            | 1.62              | Peru              | 2.95              |
| Mayotte              | 2.95              | Philippines       | 1.19              |
| Mexico               | 0.61              | Poland            | 4.27              |
| Micronesia           | 3.34              | Portugal          | 4.78              |
| Monaco               | 0.00              | Puerto Rico       | 1.21              |
| Montserrat           | 1.20              | Qatar             | 1.02              |
| Morocco              | 2.81              | Reunion           | 2.95              |
| Mozambique           | 1.83              | Romania           | 3.73              |
| Myanmar              | 0.85              | Russian Fed       | 2.50              |
| N Marianas           | 3.35              | Samoa             | 3.34              |
| Namibia              | 4.82              | Sao Tome Prn      | 2.96              |
| Nauru                | 3.31              | Saudi Arabia      | 1.02              |
| Netherlands Antilles | 1.21              | Senegal           | 2.21              |
| Netherlands          | 2.95              | Serbia Montenegro | 2.10              |
| New Caledonia        | 3.34              | Seychelles        | 2.95              |
| New Zealand          | 2.58              | Sierra Leone      | 1.52              |
| Nicaragua            | 1.50              | Singapore         | 4.01              |
| Nigeria              | 0.28              | Slovenia          | 6.23              |
| Niue                 | 3.35              | Solomon Is.       | 3.34              |
| Norfolk I.           | 0.00              | Somalia           | 2.95              |
| Norway               | 3.36              | South Africa      | 3.13              |
| Oman                 | 1.02              | Spain             | 3.86              |
| Pakistan             | 2.16              | Sri Lanka         | 1.01              |
| Palau                | 3.34              | St Helena         | 1.53              |

| Country              | Output multiplier | Country           | Output multiplier |
|----------------------|-------------------|-------------------|-------------------|
| St Kitts and Nevis   | 1.22              | US Virgin Is      | 1.22              |
| St Lucia             | 1.22              | USA               | 3.10              |
| St Pierre & Miquelon | 7.37              | Vanuatu           | 3.34              |
| St Vincent           | 1.22              | Venezuela         | 1.06              |
| Sudan                | 2.95              | Viet Nam          | 3.47              |
| Suriname             | 2.12              | Wallis and Futuna | 3.33              |
| Sweden               | 2.66              | Yemen             | 1.02              |
| Syria                | 1.02              |                   |                   |
| Taiwan               | 3.28              |                   |                   |
| Tanzania             | 2.72              |                   |                   |
| Thailand             | 2.12              |                   |                   |
| Togo                 | 1.52              |                   |                   |
| Tokelau              | 3.35              |                   |                   |
| Tonga                | 3.34              |                   |                   |
| Trinidad Tobago      | 1.22              |                   |                   |
| Tunisia              | 1.46              |                   |                   |
| Turkey               | 1.59              |                   |                   |
| Turks Caicos         | 1.21              |                   |                   |
| Tuvalu               | 3.34              |                   |                   |
| UK                   | 4.26              |                   |                   |
| Ukraine              | 5.56              |                   |                   |
| United Arab Emirates | 1.02              |                   |                   |
| Uruguay              | 2.63              |                   |                   |
| US Virgin Is         | 1.22              |                   |                   |
| USA                  | 3.10              |                   |                   |
| Vanuatu              | 3.34              |                   |                   |

246 Table S7. Dependency of a country's economy on fisheries – percentage of economic impact by  
 247 the fisheries sector to the total Gross Domestic Product (GDP) of each fishing country.

| Country                  | % of economic impact to GDP | HDI  | HDI Level |
|--------------------------|-----------------------------|------|-----------|
| Albania                  | 0.02                        | 0.72 | High      |
| Algeria                  | 0.13                        | 0.72 | High      |
| American Samoa           | 0.04                        | 0.70 | Medium    |
| Angola                   | 0.96                        | 0.53 | Low       |
| Anguilla (UK)            | 1.01                        | 0.77 | High      |
| Antigua & Barbuda        | 0.23                        | 0.77 | High      |
| Argentina                | 0.85                        | 0.81 | Very high |
| Aruba (Netherlands)      | 0.05                        | 0.79 | High      |
| Australia                | 0.17                        | 0.93 | Very high |
| Azores Isl. (Portugal)   | 0.44                        | 0.89 | Very high |
| Bahamas                  | 1.66                        | 0.79 | High      |
| Bahrain                  | 0.27                        | 0.82 | Very high |
| Bangladesh               | 0.32                        | 0.56 | Medium    |
| Barbados                 | 0.03                        | 0.78 | High      |
| Belgium                  | 0.17                        | 0.88 | Very high |
| Belize                   | 3.79                        | 0.73 | High      |
| Benin                    | 0.18                        | 0.48 | Low       |
| Bermuda (UK)             | 0.51                        | 0.91 | Very high |
| Bosnia & Herzegovina     | 0.00                        | 0.73 | High      |
| Brazil                   | 0.06                        | 0.74 | High      |
| British Virgin Isl. (UK) | 0.57                        | 0.84 | Very high |
| Brunei Darussalam        | 0.01                        | 0.85 | Very high |
| Bulgaria                 | 0.23                        | 0.78 | High      |
| Cambodia                 | 0.44                        | 0.58 | Medium    |
| Cameroon                 | 0.55                        | 0.50 | Low       |
| Canada                   | 0.42                        | 0.90 | Very high |
| Cape Verde               | 3.06                        | 0.64 | Medium    |
| Cayman Isl. (UK)         | 0.00                        | 0.87 | Very high |
| Chile                    | 3.49                        | 0.82 | Very high |
| China                    | 0.26                        | 0.72 | High      |
| Colombia                 | 0.04                        | 0.71 | High      |

| Country               | % of economic<br>impact to GDP | HDI  | HDI Level |
|-----------------------|--------------------------------|------|-----------|
| Comoros               | 11.20                          | 0.49 | Low       |
| Congo (ex-Zaire)      | 0.10                           | 0.56 | Medium    |
| Congo, R. of          | 0.70                           | 0.34 | Low       |
| Cook Islands          | 2.57                           | 0.71 | High      |
| Costa Rica            | 0.18                           | 0.76 | High      |
| Côte d'Ivoire         | 0.17                           | 0.45 | Low       |
| Croatia               | 0.22                           | 0.81 | Very high |
| Cuba                  | 0.15                           | 0.81 | Very high |
| Curacao               | 0.31                           | 0.81 | Very high |
| Denmark               | 0.85                           | 0.90 | Very high |
| Djibouti              | 0.00                           | 0.47 | Low       |
| Dominica              | 5.62                           | 0.72 | High      |
| Dominican Republic    | 0.01                           | 0.70 | High      |
| Ecuador               | 0.62                           | 0.71 | High      |
| Egypt                 | 0.04                           | 0.68 | Medium    |
| El Salvador           | 0.06                           | 0.66 | Medium    |
| Equatorial Guinea     | 0.40                           | 0.56 | Medium    |
| Eritrea               | 0.10                           | 0.38 | Low       |
| Estonia               | 1.65                           | 0.84 | Very high |
| Faeroe Isl. (Denmark) | 25.87                          | 0.86 | Very high |
| Falkland Isl. (UK)    | 48.59                          | 0.86 | Very high |
| Fiji                  | 1.46                           | 0.72 | High      |
| Finland               | 0.03                           | 0.88 | Very high |
| France                | 0.09                           | 0.88 | Very high |
| French Guiana         | 0.02                           | 0.80 | Very high |
| French Polynesia      | 16.37                          | 0.78 | High      |
| Gabon                 | 0.88                           | 0.67 | Medium    |
| Gambia                | 2.96                           | 0.44 | Low       |
| Georgia               | 0.20                           | 0.74 | High      |
| Germany               | 0.03                           | 0.91 | Very high |
| Ghana                 | 1.50                           | 0.57 | Medium    |
| Greece                | 0.66                           | 0.85 | Very high |
| Greenland             | 51.10                          | 0.79 | High      |
| Grenada               | 0.66                           | 0.74 | High      |

| Country                 | % of economic<br>impact to GDP | HDI  | HDI Level |
|-------------------------|--------------------------------|------|-----------|
| Guadeloupe (France)     | 0.06                           | 0.83 | Very high |
| Guam (USA)              | 0.02                           | 0.77 | High      |
| Guatemala               | 0.02                           | 0.63 | Medium    |
| Guinea                  | 1.53                           | 0.39 | Low       |
| Guinea-Bissau           | 2.51                           | 0.40 | Low       |
| Guyana                  | 3.60                           | 0.64 | Medium    |
| Haiti                   | 0.09                           | 0.47 | Low       |
| Honduras                | 0.45                           | 0.62 | Medium    |
| Hong Kong               | 0.13                           | 0.89 | Very high |
| Iceland                 | 22.71                          | 0.89 | Very high |
| India                   | 0.06                           | 0.59 | Medium    |
| Indonesia               | 0.29                           | 0.68 | Medium    |
| Iran                    | 0.30                           | 0.75 | High      |
| Iraq                    | 0.00                           | 0.64 | Medium    |
| Ireland                 | 0.45                           | 0.90 | Very high |
| Israel                  | 0.00                           | 0.89 | Very high |
| Italy                   | 0.15                           | 0.87 | Very high |
| Jamaica                 | 0.03                           | 0.72 | High      |
| Japan                   | 0.37                           | 0.89 | Very high |
| Jordan                  | 0.00                           | 0.75 | High      |
| Kenya                   | 0.03                           | 0.54 | Low       |
| Kiribati                | 22.51                          | 0.61 | Medium    |
| Korea (North)           | 2.36                           | 0.54 | Low       |
| Korea (South)           | 0.61                           | 0.89 | Very high |
| Kuwait                  | 0.00                           | 0.81 | Very high |
| Latvia                  | 0.69                           | 0.81 | Very high |
| Lebanon                 | 0.00                           | 0.77 | High      |
| Liberia                 | 0.91                           | 0.41 | Low       |
| Libya                   | 0.11                           | 0.78 | High      |
| Lithuania               | 0.78                           | 0.83 | Very high |
| Madagascar              | 1.25                           | 0.50 | Low       |
| Madeira Isl. (Portugal) | 0.27                           | 0.57 | Medium    |
| Malaysia                | 0.82                           | 0.77 | High      |
| Maldives                | 17.97                          | 0.70 | Medium    |

| Country                | % of economic impact to GDP | HDI  | HDI Level |
|------------------------|-----------------------------|------|-----------|
| Malta                  | 0.24                        | 0.83 | Very high |
| Marshall Isl.          | 52.15                       | 0.57 | Medium    |
| Martinique (France)    | 0.11                        | 0.84 | Very high |
| Mauritania             | 7.01                        | 0.49 | Low       |
| Mauritius              | 0.21                        | 0.77 | High      |
| Mayotte (France)       | 3.21                        | 0.69 | Medium    |
| Mexico                 | 0.05                        | 0.76 | High      |
| Micronesia             | 34.89                       | 0.65 | Medium    |
| Montenegro             | 0.03                        | 0.79 | High      |
| Montserrat (UK)        | 0.14                        | 0.64 | Medium    |
| Morocco                | 2.21                        | 0.62 | Medium    |
| Mozambique             | 0.10                        | 0.39 | Low       |
| Myanmar                | 0.10                        | 0.52 | Low       |
| Namibia                | 11.42                       | 0.62 | Medium    |
| Nauru                  | 2.03                        | 0.63 | Medium    |
| Netherlands            | 0.24                        | 0.92 | Very high |
| New Caledonia (France) | 0.24                        | 0.78 | High      |
| New Zealand            | 1.45                        | 0.91 | Very high |
| Nicaragua              | 0.40                        | 0.61 | Medium    |
| Nigeria                | 0.02                        | 0.50 | Low       |
| Niue (New Zealand)     | 11.76                       | 0.64 | Medium    |
| North Cyprus           | 0.12                        | 0.85 | Very high |
| North Marianas (USA)   | 0.03                        | 0.77 | High      |
| Norway                 | 1.05                        | 0.94 | Very high |
| Oman                   | 0.28                        | 0.78 | High      |
| Pakistan               | 0.33                        | 0.54 | Low       |
| Palau                  | 2.33                        | 0.77 | High      |
| Panama                 | 1.72                        | 0.77 | High      |
| Papua New Guinea       | 3.58                        | 0.49 | Low       |
| Peru                   | 13.86                       | 0.74 | High      |
| Philippines            | 0.43                        | 0.66 | Medium    |
| Poland                 | 0.09                        | 0.83 | Very high |
| Portugal               | 0.75                        | 0.82 | Very high |
| Puerto Rico (USA)      | 0.01                        | 0.87 | Very high |

| Country                        | % of economic<br>impact to GDP | HDI  | HDI Level |
|--------------------------------|--------------------------------|------|-----------|
| Qatar                          | 0.01                           | 0.85 | Very high |
| Réunion (France)               | 0.11                           | 0.82 | Very high |
| Romania                        | 0.03                           | 0.78 | High      |
| Russian Federation             | 0.30                           | 0.78 | High      |
| Saint Helena (UK)              | 6.88                           | 0.65 | Medium    |
| Saint Kitts & Nevis            | 0.12                           | 0.75 | High      |
| Saint Lucia                    | 0.20                           | 0.71 | High      |
| Saint Vincent & the Grenadines | 2.80                           | 0.72 | High      |
| Samoa                          | 3.17                           | 0.69 | Medium    |
| Sao Tome & Principe            | 14.93                          | 0.56 | Medium    |
| Saudi Arabia                   | 0.04                           | 0.84 | Very high |
| Senegal                        | 13.54                          | 0.49 | Low       |
| Seychelles                     | 7.34                           | 0.76 | High      |
| Sierra Leone                   | 2.97                           | 0.37 | Low       |
| Singapore                      | 0.00                           | 0.90 | Very high |
| Slovenia                       | 0.04                           | 0.87 | Very high |
| Solomon Isl.                   | 16.00                          | 0.49 | Low       |
| Somalia                        | 6.57                           | 0.27 | Low       |
| South Africa                   | 0.41                           | 0.66 | Medium    |
| South Cyprus                   | 0.07                           | 0.85 | Very high |
| Spain                          | 0.53                           | 0.87 | Very high |
| Sri Lanka                      | 0.18                           | 0.75 | High      |
| Sudan                          | 0.00                           | 0.47 | Low       |
| Suriname                       | 0.67                           | 0.70 | High      |
| Sweden                         | 0.07                           | 0.90 | Very high |
| Syrian Arab Republic           | 0.01                           | 0.66 | Medium    |
| Taiwan                         | 0.98                           | 0.88 | Very high |
| Tanzania                       | 0.16                           | 0.49 | Low       |
| Thailand                       | 1.06                           | 0.72 | High      |
| Timor Leste                    | 0.03                           | 0.62 | Medium    |
| Togo                           | 1.19                           | 0.47 | Low       |
| Tokelau (New Zealand)          | 42.48                          | 0.53 | Low       |
| Tonga                          | 0.95                           | 0.70 | High      |
| Trinidad & Tobago              | 0.07                           | 0.77 | High      |



| Country                       | % of economic<br>impact to GDP | HDI  | HDI Level |
|-------------------------------|--------------------------------|------|-----------|
| Tunisia                       | 0.42                           | 0.72 | High      |
| Turkey                        | 0.22                           | 0.76 | High      |
| Turks & Caicos Isl. (UK)      | 1.55                           | 0.75 | High      |
| Tuvalu                        | 70.25                          | 0.55 | Low       |
| Ukraine                       | 0.45                           | 0.73 | High      |
| United Arab Emirates          | 0.03                           | 0.83 | Very high |
| United Kingdom                | 0.36                           | 0.89 | Very high |
| Uruguay                       | 0.67                           | 0.79 | High      |
| US Virgin Isl.                | 0.09                           | 0.78 | High      |
| USA                           | 0.24                           | 0.91 | Very high |
| Vanuatu                       | 38.29                          | 0.62 | Medium    |
| Venezuela                     | 0.12                           | 0.76 | High      |
| Viet Nam                      | 0.31                           | 0.64 | Medium    |
| Wallis & Futuna Isl. (France) | 2.66                           | 0.68 | Medium    |
| Yemen                         | 0.52                           | 0.50 | Low       |

248

249

250

251

252 References

- 253 1 Dunne, J. P. *et al.* GFDL's ESM2 global coupled climate-carbon Earth System Models. Part I:  
254 Physical formulation and baseline simulation characteristics. *Journal of Climate* **25**, 6646-6665  
255 (2012).
- 256 2 Dufresne, J.-L. *et al.* Climate change projections using the IPSL-CM5 Earth System Model: from  
257 CMIP3 to CMIP5. *Climate Dynamics* **40**, 2123-2165 (2013).
- 258 3 Giorgetta, M. A. *et al.* Climate and carbon cycle changes from 1850 to 2100 in MPI-ESM  
259 simulations for the Coupled Model Intercomparison Project phase 5. *Journal of Advances in*  
260 *Modeling Earth Systems* **5**, 572-597 (2013).
- 261 4 Van Vuuren, D. P. *et al.* The representative concentration pathways: an overview. *Climatic*  
262 *Change* **109**, 5-31 (2011).
- 263 5 Close C, C. W., Hodgson S, Lam V, Watson R, Pauly D. Distribution ranges of commercial fishes  
264 and invertebrates. *Fishes in Databases and Ecosystems. Fisheries Centre Research Reports* **14**,  
265 27-37 (2006).
- 266 6 Cheung, W. W., Lam, V. W. & Pauly, D. Modelling present and climate-shifted distribution of  
267 marine fishes and invertebrates. (2008).
- 268 7 Pauly, D. The relationships between gill surface area and growth performance in fish: a  
269 generalization of von Bertalanffy's theory of growth. *Meeresforschung* **28**, 251-282 (1981).
- 270 8 Pauly, D. & Kinne, O. *Gasping fish and panting squids: oxygen, temperature and the growth of*  
271 *water-breathing animals*. Vol. 22 (International Ecology Institute, 2010).
- 272 9 Pörtner, H.-O. Oxygen-and capacity-limitation of thermal tolerance: a matrix for integrating  
273 climate-related stressor effects in marine ecosystems. *The Journal of experimental biology* **213**,  
274 881-893 (2010).
- 275 10 Cheung, W. W. *et al.* Projecting global marine biodiversity impacts under climate change  
276 scenarios. *Fish Fish* **10**, 235-251 (2009).
- 277 11 Cheung, W. W., Watson, R. & Pauly, D. Signature of ocean warming in global fisheries catch.  
278 *Nature* **497**, 365-368 (2013).
- 279 12 Cheung, W. W., Dunne, J., Sarmiento, J. L. & Pauly, D. Integrating ecophysiology and plankton  
280 dynamics into projected maximum fisheries catch potential under climate change in the  
281 Northeast Atlantic. *ICES J Mar Sci*, doi:10.1093/icesjms/fsr012 (2011).
- 282 13 Zeller, D. *et al.* Still catching attention: Sea Around Us reconstructed global catch data, their  
283 spatial expression and public accessibility. *Marine Policy* **70**, 145-152 (2016).
- 284 14 Jones, M. C. & Cheung, W. W. Multi-model ensemble projections of climate change effects on  
285 global marine biodiversity. *ICES Journal of Marine Science: Journal du Conseil*, fsu172 (2014).
- 286 15 Cheung, W. W. L. *et al.* Structural uncertainty in projecting global fisheries catches under climate  
287 change. *Ecol. Model.* **325**, 57 - 66 (2016).
- 288 16 Sumaila, U. R., Marsden, A. D., Watson, R. & Pauly, D. A global ex-vessel fish price database:  
289 construction and applications. *J. Bioecon.* **9**, 39-51 (2007).
- 290 17 Swartz, W., Sumaila, R. & Watson, R. Global Ex-vessel Fish Price Database Revisited: A New  
291 Approach for Estimating 'Missing' Prices. *Environ. Resour. Econ.*, 1-14, doi:10.1007/s10640-012-  
292 9611-1 (2012).
- 293 18 Murawski, S. A. & Serchuk, F. M. Mechanized shellfish harvesting and its management: the  
294 offshore clam fishery of the eastern United States. *Marine invertebrate fisheries: their*  
295 *assessment and management*. Wiley, New York, 479-506 (1989).

296 19 Division, D. F. & Fisheries, D. C. f. *Towards sustainable fisheries: economic aspects of the*  
297 *management of living marine resources*. Vol. 1 (OECD, 1997).

298 20 Asche, F., Bremnes, H. & Wessells, C. R. Product aggregation, market integration, and  
299 relationships between prices: an application to world salmon markets. *American Journal of*  
300 *Agricultural Economics* **81**, 568-581 (1999).

301 21 Hannesson, R. Globalisation of seafood prices: some examples. *ACP-EU Fisheries Research*  
302 *Report* **5**, 15-16 (1999).

303 22 Pinnegar, J. K., Hutton, T. P. & Placenti, V. What relative seafood prices can tell us about the  
304 status of stocks. *Fish and Fisheries* **7**, 219-226 (2006).

305 23 Alexandratos, N. *World agriculture: towards 2010: an FAO study*. (Food & Agriculture Org.,  
306 1995).

307 24 Sverdrup-Jensen, S. Fish demand and supply projections. *Naga, the ICLARM Quarterly* **20**, 77-78  
308 (1997).

309 25 Delgado, C. L. & Courbois, C. Changing fish trade and demand patterns in developing countries  
310 and their significance for policy research. (International Food Policy Research Institute (IFPRI),  
311 1997).

312 26 Delgado, C. L. *Fish to 2020: Supply and demand in changing global markets*. Vol. 62 (WorldFish,  
313 2003).

314 27 Pontecorvo, G., Wilkinson, M., Anderson, R. & Holdowsky, M. Contribution of the ocean sector  
315 to the United States economy. *Science* **208**, 1000-1006 (1980).

316 28 Arnason, R. Climate change and fisheries: assessing the economic impact in Iceland and  
317 Greenland. *Natural Resource Modeling* **20**, 163-197 (2007).

318 29 Dyck, A. J. & Sumaila, U. R. Economic impact of ocean fish populations in the global fishery. *J.*  
319 *Bioecon.* **12**, 227-243 (2010).

320
